# Supplementary figures and images for: Navigating Neighbourhood Opposition and Climate Change: Feasibility and Acceptability of a Play Street Pilot in Sydney, Australia
Source: MDPI journal article supplement (doi:10.3390/ijerph20032476), 2023-01-30

**Figure S1.** Images of the pilot Play Street, Inner West Sydney, March 2020.

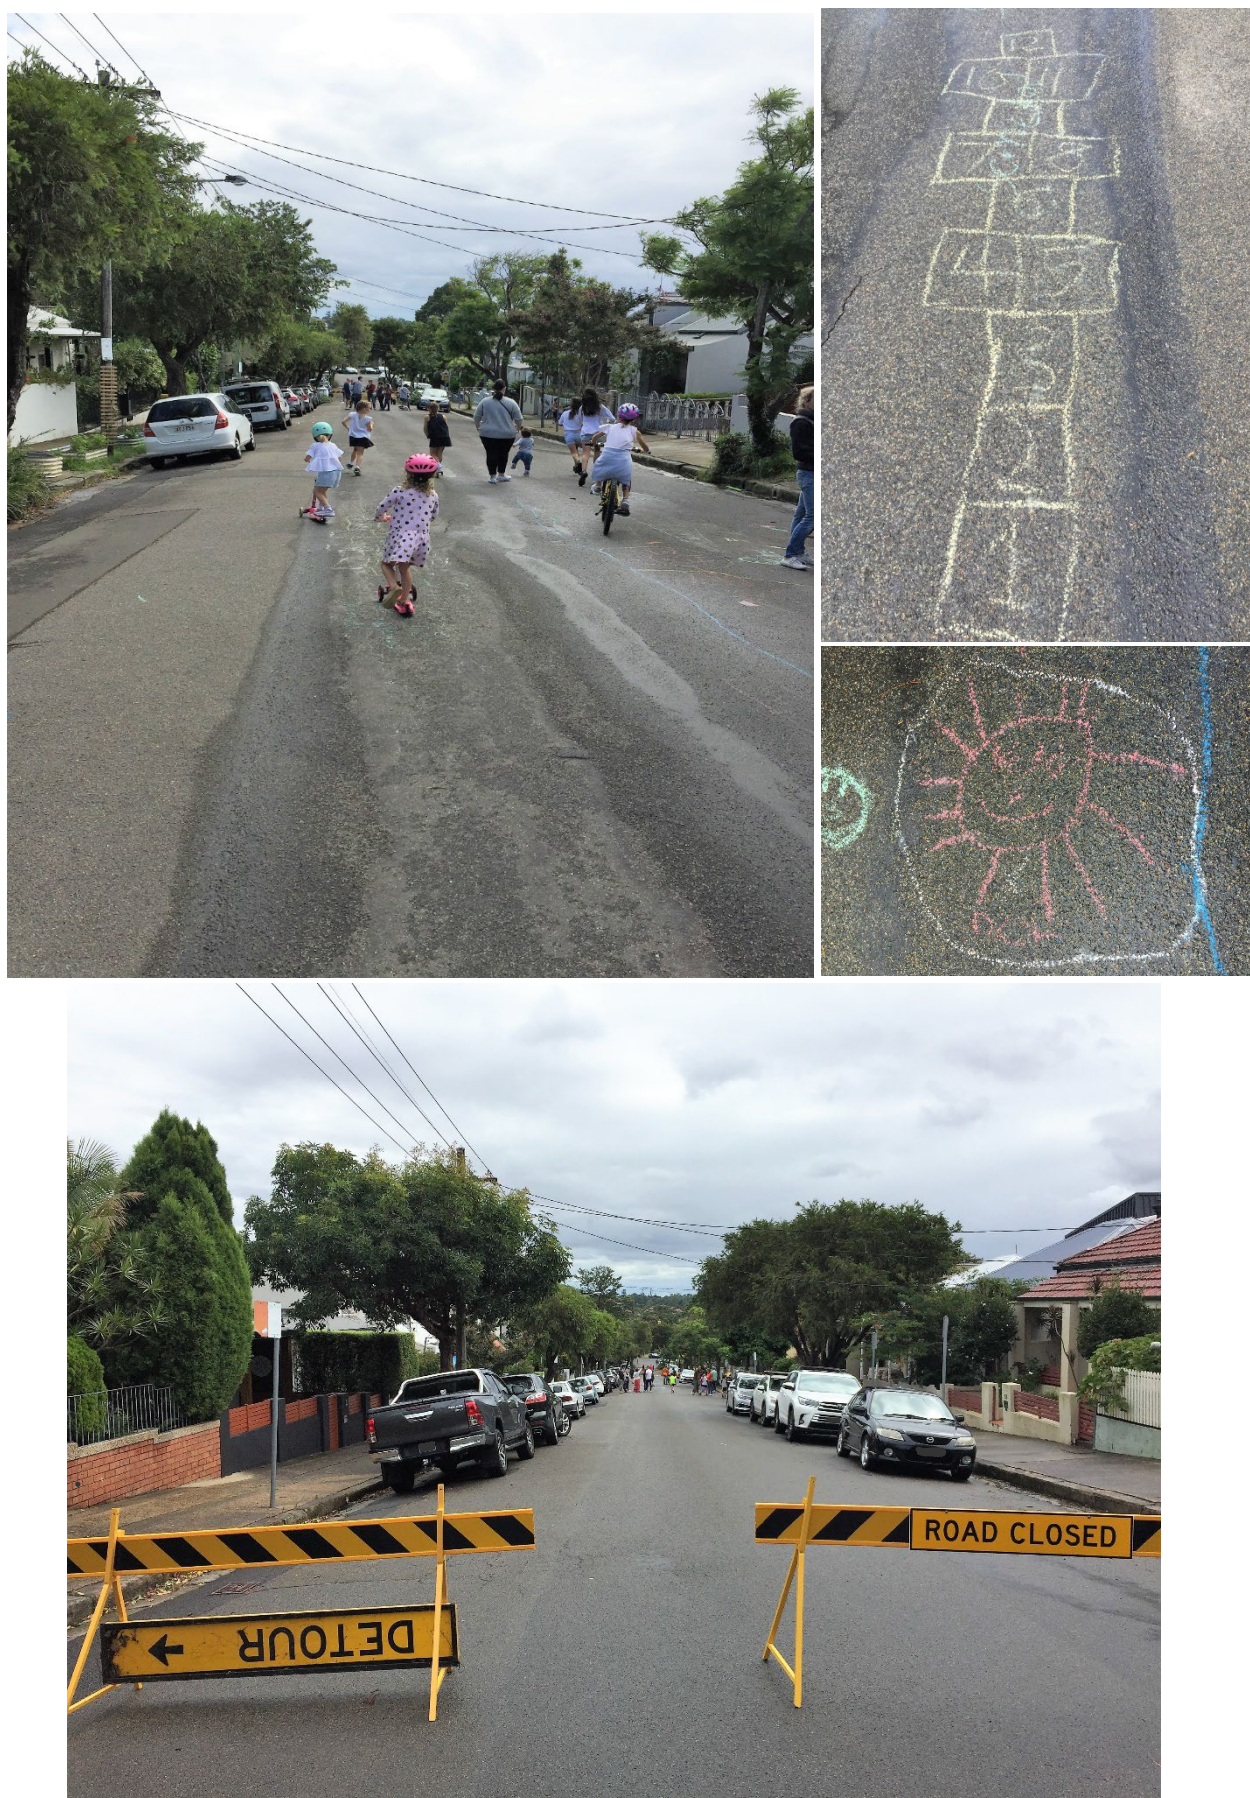

Supplement: s1 [file s1]
